# Supplementary material for: Association of the Dietary Inflammatory Index with Depressive Symptoms among Pre- and Post-Menopausal Women: Findings from the National Health and Nutrition Examination Survey (NHANES) 2005–2010
Source: MDPI journal article supplement (doi:10.3390/nu14091980), 2022-05-09
Supplement: s1 [file s1]

**Table S1.** Estimated Beta and Standard Errors for the Effects of Dietary Inflammatory Index Quartiles and Score for Somatic Symptoms of Depression\* among Pre- and Post-menopausal Participants from the National Health and Nutrition Examination Survey 2005–2010.

|                                   | Model 1 <sup>a</sup> |            | Model 2 <sup>b</sup> |             |
|-----------------------------------|----------------------|------------|----------------------|-------------|
|                                   | Beta (SE)            | 95% CI     | Beta (SE)            | 95% CI      |
| Pre-menopause ( <i>n</i> = 2512)  |                      |            |                      |             |
| Quartile 1                        | Referent             | –          | Referent             | –           |
| Quartile 2                        | 0.33 (0.15)          | 0.02, 0.64 | 0.19 (0.15)          | –0.10, 0.49 |
| Quartile 3                        | 0.46 (0.15)          | 0.16, 0.76 | 0.20 (0.15)          | –0.09, 0.49 |
| Quartile 4                        | 0.76 (0.14)          | 0.47, 1.05 | 0.31 (0.15)          | 0.02, 0.61  |
| <i>p</i> -trend                   | <0.001               |            | 0.050                |             |
| Post-menopause ( <i>n</i> = 2392) |                      |            |                      |             |
| Quartile 1                        | Referent             | –          | Referent             | –           |
| Quartile 2                        | 0.26 (0.15)          | –0.4, 0.56 | 0.10 (0.15)          | –0.19, 0.40 |
| Quartile 3                        | 0.39 (0.15)          | 0.09, 0.68 | 0.09 (0.15)          | –0.20, 0.38 |
| Quartile 4                        | 0.83 (0.14)          | 0.54, 1.11 | 0.37 (0.15)          | 0.08, 0.67  |
| <i>p</i> -trend                   | <0.001               |            | 0.010                |             |

\* Range of Score: 0–12 <sup>a</sup>. Model 1: Adjusted for age <sup>b</sup>. Model 2: Adjusted for age, race (White, Hispanic, Black, Multiracial), BMI (underweight/normal weight, overweight/obese), waist circumference ( $\leq 35$  inches (low risk),  $>35$  inches (high risk)), marital status (Married/Partner, Divorced/Widowed/Separated, Never married), education (below high school, high school degree, some college/AA, college graduate and higher), smoking (never smoker, ever smoker), poverty-to-income ratio (quartiles), physical activity (quartiles). SE, standard error; CI, confidence interval; BMI, body mass index; AA, associate degrees.

**Table S2.** Estimated Beta and Standard Errors for the Effects of Dietary Inflammatory Index Quartiles and Score for Cognitive Symptoms of Depression\* among Pre- and Post-menopausal Participants from the National Health and Nutrition Examination Survey 2005–2010.

|                                   | Model 1 <sup>a</sup> |            | Model 2 <sup>b</sup> |             |
|-----------------------------------|----------------------|------------|----------------------|-------------|
|                                   | Beta (SE)            | 95% CI     | Beta (SE)            | 95% CI      |
| Pre-menopause ( <i>n</i> = 2512)  |                      |            |                      |             |
| Quartile 1                        | Referent             | –          | Referent             | –           |
| Quartile 2                        | 0.31 (0.15)          | 0.1, 0.61  | 0.18 (0.15)          | –0.10, 0.48 |
| Quartile 3                        | 0.53 (0.14)          | 0.25, 0.82 | 0.29 (0.14)          | 0.007, 0.58 |
| Quartile 4                        | 0.81 (0.14)          | 0.53, 1.09 | 0.42 (0.14)          | 0.13, 0.71  |
| <i>p</i> -trend                   | <0.001               |            | 0.003                |             |
| Post-menopause ( <i>n</i> = 2392) |                      |            |                      |             |
| Quartile 1                        | Referent             | –          | Referent             | –           |
| Quartile 2                        | 0.21 (0.15)          | –0.8, 0.51 | 0.05 (0.15)          | –0.24, 0.34 |
| Quartile 3                        | 0.37 (0.14)          | 0.09, 0.66 | 0.04 (0.14)          | –0.24, 0.33 |
| Quartile 4                        | 0.87 (0.14)          | 0.59, 1.15 | 0.32 (0.14)          | 0.04, 0.61  |
| <i>p</i> -trend                   | <0.001               |            | 0.016                |             |

\* Range of Score: 0–15 <sup>a</sup>. Model 1: Adjusted for age <sup>b</sup>. Model 2: Adjusted for age, race (White, Hispanic, Black, Multiracial), BMI (underweight/normal weight, overweight/obese), waist circumference ( $\leq 35$  inches (low risk),  $>35$  inches (high risk)), marital status (Married/Partner, Divorced/Widowed/Separated, Never married), education (below high school, high school degree, some college/AA, college graduate and higher), smoking (never smoker, ever smoker), poverty-to-income ratio (quartiles), physical activity (quartiles).
